# Supplementary material for: Identifying harm reduction strategies for alcohol and drug-use in inpatient care settings and emergency departments: a scoping review protocol
Source: HighWire-hosted journal article supplement (doi:10.1136/bmjopen-2021-055654), 2021-10-01
Supplement: bmjopen-2021-055654supp001_data_supplement.pdf [file bmjopen-2021-055654supp001_data_supplement.pdf]

Supplementary Table 1: Search strategy MEDLINE All (Ovid); Embase (Elsevier Embase.com); CINAHL with Full Text (EBSCOhost); PsycINFO (EBSCOhost); Scopus (Elsevier Scopus.com)

|    | MEDLINE All (Ovid)                                                                                                              | Embase (Elsevier Embase.com)                                                                                                                           | CINAHL with Full Text (EBSCOhost) - search mode: Boolean/Phrase                                                                  | PsycINFO (EBSCOhost)                                                                                                             | Scopus (Elsevier Scopus.com)                                                                                                                                                                                                                                                                                                                                                                                                                                                                                                                                                                                                                                                                                                                                                                                                                                                                                                                                                                                                                                                                                                                                                                 |
|----|---------------------------------------------------------------------------------------------------------------------------------|--------------------------------------------------------------------------------------------------------------------------------------------------------|----------------------------------------------------------------------------------------------------------------------------------|----------------------------------------------------------------------------------------------------------------------------------|----------------------------------------------------------------------------------------------------------------------------------------------------------------------------------------------------------------------------------------------------------------------------------------------------------------------------------------------------------------------------------------------------------------------------------------------------------------------------------------------------------------------------------------------------------------------------------------------------------------------------------------------------------------------------------------------------------------------------------------------------------------------------------------------------------------------------------------------------------------------------------------------------------------------------------------------------------------------------------------------------------------------------------------------------------------------------------------------------------------------------------------------------------------------------------------------|
| 1  | Harm Reduction/ (harm* adj2                                                                                                     | 1 'harm reduction'/exp (harm* NEAR/2                                                                                                                   | 1 (MH "Harm Reduction")                                                                                                          | 1 DE "Harm Reduction"                                                                                                            | 1 TITLE-ABS-KEY((harm* W/2 (reduc* OR minimiz* OR minimis*)) OR stigma* OR destigma* OR "de-stigma" OR (addiction* W/2 (consultation* OR counsel* OR therap* OR treatment* OR service*)) OR "medication assisted therap*" OR "medication assisted treatment*" OR "opiate substitution*" OR "opiate replacement*" OR "opioid* substitution*" OR "opioid* replacement*" OR "opioid agonist*" OR "substitution therap*" OR methadone OR buprenorphine OR naloxone OR "non-abstinence" OR ((needle* OR syringe*) W/2 (exchange* OR clean* OR steril*)) OR ((supervised OR supervized) W/2 (inject* OR consum*)) OR (consumption W/3 site) OR "overdose prevention site*" OR "safe supply" OR ((care OR healthcare) W/2 (retention OR retain* OR continuity OR continuum)) OR aftercare OR handoff OR "hand-off" OR "patient transition*" OR "patient transfer*" OR "leav* against medical advice" OR "left against medical advice" OR (leav* W/2 early) OR (left W/2 early) OR abscond* OR (early W/1 discharge*) OR ((staff OR worker* OR employee* OR system) W/3 (cultur* OR attitude* OR belief* OR misconception* OR perception* OR perceiv* OR resist* OR educat* OR train* OR language))) |
| 2  | reduc*).ti,ab,kw,kf.                                                                                                            | 2 reduc*):ti,ab,kw                                                                                                                                     | 2 (harm* N2 reduc*)                                                                                                              | 2 (harm* N2 reduc*)                                                                                                              |                                                                                                                                                                                                                                                                                                                                                                                                                                                                                                                                                                                                                                                                                                                                                                                                                                                                                                                                                                                                                                                                                                                                                                                              |
| 3  | (harm* adj2 (minimiz* or minimis*)):ti,ab,kw, kf.                                                                               | 3 (harm* NEAR/2 (minimiz* OR minimis*)):ti,ab,kw                                                                                                       | 3 (harm* N2 (minimiz* OR minimis*))                                                                                              | 3 (harm* N2 (minimiz* OR minimis*))                                                                                              |                                                                                                                                                                                                                                                                                                                                                                                                                                                                                                                                                                                                                                                                                                                                                                                                                                                                                                                                                                                                                                                                                                                                                                                              |
| 4  | or/1-3 (stigma* or destigma* or de-stigma*).ti,ab,kw,kf                                                                         | 4 #1 OR #2 OR #3                                                                                                                                       | 4 S1 OR S2 OR S3                                                                                                                 | 4 S1 OR S2 OR S3                                                                                                                 |                                                                                                                                                                                                                                                                                                                                                                                                                                                                                                                                                                                                                                                                                                                                                                                                                                                                                                                                                                                                                                                                                                                                                                                              |
| 5  | . (addiction* adj2 (consultation* or counsel* or therap* or treatment* or service*)):ti,ab,kw, kf.                              | 5 (stigma* OR destigma* OR 'de-stigma*'):ti,ab,kw<br><br>(addiction* NEAR/2 (consultation* OR counsel* OR therap* OR treatment* OR service*)):ti,ab,kw | 5 (stigma* OR destigma* OR "de-stigma*")<br><br>(addiction* N2 (consultation* OR counsel* OR therap* OR treatment* OR service*)) | 5 (stigma* OR destigma* OR "de-stigma*")<br><br>(addiction* N2 (consultation* OR counsel* OR therap* OR treatment* OR service*)) |                                                                                                                                                                                                                                                                                                                                                                                                                                                                                                                                                                                                                                                                                                                                                                                                                                                                                                                                                                                                                                                                                                                                                                                              |
| 6  | Opiate Substitution Treatment/                                                                                                  | 6 'opiate substitution treatment'/exp                                                                                                                  | 6 (MH "Addictions Nursing")                                                                                                      | 6 DE "Medication-Assisted Treatment"                                                                                             |                                                                                                                                                                                                                                                                                                                                                                                                                                                                                                                                                                                                                                                                                                                                                                                                                                                                                                                                                                                                                                                                                                                                                                                              |
| 7  | (medication assisted therap* or medication assisted treatment*).ti,ab,kw, kf.                                                   | 7 'methadone treatment'/exp                                                                                                                            | 7 (MH "Addictions Nursing")                                                                                                      | 7 DE "Methadone Maintenance"                                                                                                     |                                                                                                                                                                                                                                                                                                                                                                                                                                                                                                                                                                                                                                                                                                                                                                                                                                                                                                                                                                                                                                                                                                                                                                                              |
| 8  | (opiate substitution* or opiate replacement* or opioid* substitution* or opioid* replacement* or opioid agonist?).ti,ab,kw, kf. | 8 ('medication assisted therap*' OR 'medication assisted treatment*'):ti,ab,kw                                                                         | 8 ("medication assisted therap*" OR "medication assisted treatment*")                                                            | 8 ("medication assisted therap*" OR "medication assisted treatment*")                                                            |                                                                                                                                                                                                                                                                                                                                                                                                                                                                                                                                                                                                                                                                                                                                                                                                                                                                                                                                                                                                                                                                                                                                                                                              |
| 9  | substitution therap*.ti,ab,kw,kf.                                                                                               | 9 ('opiate substitution*' OR 'opiate replacement*' OR 'opioid* substitution*' OR 'opioid* replacement*' OR 'opioid agonist\$'):ti,ab,kw                | 9 ("opiate substitution*" OR "opiate replacement*" OR "opioid* substitution*" OR "opioid* replacement*" OR "opioid agonist#")    | 9 ("opiate substitution*" OR "opiate replacement*" OR "opioid* substitution*" OR "opioid* replacement*" OR "opioid agonist#")    |                                                                                                                                                                                                                                                                                                                                                                                                                                                                                                                                                                                                                                                                                                                                                                                                                                                                                                                                                                                                                                                                                                                                                                                              |
| 10 |                                                                                                                                 | 10 'substitution therap*':ti,ab,kw                                                                                                                     | 10 "substitution therap*"                                                                                                        | 10 "substitution therap*"                                                                                                        |                                                                                                                                                                                                                                                                                                                                                                                                                                                                                                                                                                                                                                                                                                                                                                                                                                                                                                                                                                                                                                                                                                                                                                                              |

|    |                                                                                                       |    |                                                                                               |    |                                                                                      |    |                                                                                      |
|----|-------------------------------------------------------------------------------------------------------|----|-----------------------------------------------------------------------------------------------|----|--------------------------------------------------------------------------------------|----|--------------------------------------------------------------------------------------|
| 11 | (methadone or buprenorphine or naloxone).ti,ab,kw, kf.                                                | 12 | (methadone OR buprenorphine OR naloxone):ti,ab,kw                                             | 11 | (methadone OR buprenorphine OR naloxone)                                             | 12 | (methadone OR buprenorphine OR naloxone)                                             |
| 12 | non-abstinence.ti,ab,kw, kf.                                                                          | 13 | ('non-abstinence'):ti,ab,kw                                                                   | 12 | ("non-abstinence")                                                                   | 13 | ("non-abstinence")                                                                   |
| 13 | or/7-12                                                                                               | 14 | #7 OR #8 OR #9 OR #10 OR #11 OR #12 OR #13                                                    | 13 | S7 OR S8 OR S9 OR S10 OR S11 OR S12                                                  | 14 | S7 OR S8 OR S9 OR S10 OR S11 OR S12 OR S13                                           |
| 14 | Needle-Exchange Programs/ ((needle* or syringe*) adj2 (exchange* or clean* or steril*)):ti,ab,kw, kf. | 15 | ((needle* OR syringe*) NEAR/2 (exchange* OR clean* OR steril*)):ti,ab,kw                      | 14 | (MH "Needle Exchange Programs")                                                      | 15 | DE "Needle Exchange Programs"                                                        |
| 15 | (supervi?ed adj2 (inject* or consum*)):ti,ab,kw, kf.                                                  | 16 | ((needle* OR syringe*) NEAR/2 (exchange* OR clean* OR steril*)):ti,ab,kw                      | 15 | ((needle* OR syringe*) N2 (exchange* OR clean* OR steril*))                          | 16 | ((needle* OR syringe*) N2 (exchange* OR clean* OR steril*))                          |
| 16 | (consumption adj3 site?):ti,ab,kw, kf.                                                                | 17 | (supervi?ed NEAR/2 (inject* OR consum*)):ti,ab,kw                                             | 16 | (supervi?ed N2 (inject* OR consum*))                                                 | 17 | (supervi?ed N2 (inject* OR consum*))                                                 |
| 17 | overdose prevention site?.ti,ab,kw, kf.                                                               | 18 | (consumption NEAR/3 site\$):ti,ab,kw                                                          | 17 | (consumption N3 site#)                                                               | 18 | (consumption N3 site#)                                                               |
| 18 | safe supply.ti,ab,kw, kf.                                                                             | 19 | 'overdose prevention site\$':ti,ab,kw                                                         | 18 | ("overdose prevention site#")                                                        | 19 | ("overdose prevention site#")                                                        |
| 19 | or/14-19                                                                                              | 20 | 'safe supply':ti,ab,kw                                                                        | 19 | ("safe supply")                                                                      | 20 | ("safe supply")                                                                      |
| 20 | exp Continuity of Patient Care/                                                                       | 21 | #15 OR #16 OR #17 OR #18 OR #19                                                               | 20 | S14 OR S15 OR S16 OR S17 OR S18 OR S19                                               | 21 | S15 OR S16 OR S17 OR S18 OR S19 OR S20                                               |
| 21 | ((care or healthcare) adj2 (retention or retain* or continuity or continuum)):ti,ab,kw, kf.           | 22 | 'retention in care'/exp                                                                       | 21 | (MH "Continuity of Patient Care+")                                                   | 22 | DE "Continuum of Care"                                                               |
| 22 | (aftercare or handoff or hand-off or patient transition* or patient                                   | 23 | ((care OR healthcare) NEAR/2 (retention OR retain* OR continuity OR continuum)):ti,ab,kw      | 22 | ((care OR healthcare) N2 (retention OR retain* OR continuity OR continuum))          | 23 | DE "Discharge Planning"                                                              |
| 23 | transition* or patient                                                                                | 24 | (aftercare OR handoff OR 'hand-off' OR 'patient transition*' OR 'patient transfer*'):ti,ab,kw | 23 | (aftercare OR handoff OR "hand-off" OR "patient transition*" OR "patient transfer*") | 24 | DE "Aftercare"                                                                       |
|    |                                                                                                       | 25 |                                                                                               | 24 |                                                                                      | 25 | ((care OR healthcare) N2 (retention OR retain* OR continuity OR continuum))          |
|    |                                                                                                       | 26 |                                                                                               | 25 |                                                                                      | 26 | (aftercare OR handoff OR "hand-off" OR "patient transition*" OR "patient transfer*") |

|    |                                                                                                                                                                                                    |    |                                                                                                                                                                                        |    |                                                                                                                                                                           |    |                                                                                                                                                                                  |                                                                                                                                                                                                                       |
|----|----------------------------------------------------------------------------------------------------------------------------------------------------------------------------------------------------|----|----------------------------------------------------------------------------------------------------------------------------------------------------------------------------------------|----|---------------------------------------------------------------------------------------------------------------------------------------------------------------------------|----|----------------------------------------------------------------------------------------------------------------------------------------------------------------------------------|-----------------------------------------------------------------------------------------------------------------------------------------------------------------------------------------------------------------------|
|    | transfer*).ti,ab,kw, kf.                                                                                                                                                                           |    |                                                                                                                                                                                        |    |                                                                                                                                                                           |    |                                                                                                                                                                                  |                                                                                                                                                                                                                       |
| 24 | (leav* against medical advice or left against medical advice or (leav* adj2 early) or (left adj2 early) or abscond* or (early adj discharge*)):ti,ab,kw, kf.                                       | 24 | ('leav* against medical advice' OR 'left against medical advice' OR (leav* NEAR/2 early) OR (left NEAR/2 early) OR abscond* OR (early NEAR/1 discharge*)):ti,ab,kw                     | 24 | ("leav* against medical advice" OR "left against medical advice" OR (leav* N2 early) OR (left N2 early) OR abscond* OR (early N1 discharge*))                             | 27 | ("leav* against medical advice" OR "left against medical advice" OR (leav* N2 early) OR (left N2 early) OR abscond* OR (early N1 discharge*))<br>S22 OR S23 OR S24 OR S25 OR S26 |                                                                                                                                                                                                                       |
| 25 | or/21-24 ((staff or worker* or employee* or system) adj3 (cultur* or attitude* or belief* or misconception* or perception* or perceiv* or resist* or educat* or train* or language)):ti,ab,kw, kf. | 25 | #21 OR #22 OR #23 OR #24                                                                                                                                                               | 25 | S21 OR S22 OR S23 OR S24                                                                                                                                                  | 28 | OR S27                                                                                                                                                                           |                                                                                                                                                                                                                       |
| 26 |                                                                                                                                                                                                    | 26 | ((staff OR worker* OR employee* OR system) NEAR/3 (cultur* OR attitude* OR belief* OR misconception* OR perception* OR perceiv* OR resist* OR educat* OR train* OR language)):ti,ab,kw | 26 | ((staff OR worker* OR employee* OR system) N3 (cultur* OR attitude* OR belief* OR misconception* OR perception* OR perceiv* OR resist* OR educat* OR train* OR language)) | 29 | ((staff OR worker* OR employee* OR system) N3 (cultur* OR attitude* OR belief* OR misconception* OR perception* OR perceiv* OR resist* OR educat* OR train* OR language))        |                                                                                                                                                                                                                       |
| 27 | or/4-6,13,20,25-26 exp                                                                                                                                                                             | 27 | #4 OR #5 OR #6 OR #14 OR #20 OR #25 OR #26                                                                                                                                             | 27 | S4 OR S5 OR S6 OR S13 OR S20 OR S25 OR S26                                                                                                                                | 30 | S4 OR S5 OR S6 OR S14 OR S21 OR S28 OR S29                                                                                                                                       |                                                                                                                                                                                                                       |
| 28 | Hospitalization/                                                                                                                                                                                   | 28 | 'hospitalization'/exp                                                                                                                                                                  | 28 | (MH "Hospitalization")                                                                                                                                                    | 31 | DE "Hospitalization"                                                                                                                                                             |                                                                                                                                                                                                                       |
| 29 | Inpatients/                                                                                                                                                                                        | 29 | 'hospital patient'/de                                                                                                                                                                  | 29 | (MH "Inpatients")                                                                                                                                                         | 32 | DE "Hospital Admission"                                                                                                                                                          |                                                                                                                                                                                                                       |
|    | (admitted or admission* or hospitalis* or hospitaliz* or inpatient* or inpatient* or overnight*):ti,ab,kw, kf.                                                                                     | 30 | (admitted OR admission* OR hospitalis* OR hospitaliz* OR inpatient* OR 'in-patient*' OR overnight*):ti,ab,kw                                                                           | 30 | (admitted OR admission* OR hospitalis* OR hospitaliz* OR inpatient* OR overnight*)                                                                                        | 33 | DE "Psychiatric Hospitalization"                                                                                                                                                 |                                                                                                                                                                                                                       |
| 30 |                                                                                                                                                                                                    |    |                                                                                                                                                                                        |    |                                                                                                                                                                           | 34 | DE "Hospitalized Patients"                                                                                                                                                       |                                                                                                                                                                                                                       |
|    |                                                                                                                                                                                                    |    |                                                                                                                                                                                        |    |                                                                                                                                                                           |    | 2                                                                                                                                                                                | TITLE-ABS-KEY(admitted OR admission* OR hospitalis* OR hospitaliz* OR inpatient* OR overnight* OR "emergency department*" OR "emergency room*" OR "emergency unit*" OR "emergency ward*" OR "accident and emergency") |

|    |                                                                                                                                                                    |    |                                                                                                                                                                  |    |                                                                                                                                                     |    |                                                                                                                                                             |                                                                                                                                                                                                                                                                                                                                                                                                                                          |
|----|--------------------------------------------------------------------------------------------------------------------------------------------------------------------|----|------------------------------------------------------------------------------------------------------------------------------------------------------------------|----|-----------------------------------------------------------------------------------------------------------------------------------------------------|----|-------------------------------------------------------------------------------------------------------------------------------------------------------------|------------------------------------------------------------------------------------------------------------------------------------------------------------------------------------------------------------------------------------------------------------------------------------------------------------------------------------------------------------------------------------------------------------------------------------------|
| 31 | (emergency department* or emergency room* or emergency unit? or emergency ward* or "accident and emergency").ti,ab,kw,kf.                                          | 31 | ('emergency department*' OR 'emergency room*' OR 'emergency unit\$' OR 'emergency ward*' OR 'accident and emergency'):ti,ab,kw                                   | 31 | ("emergency department*" OR "emergency room*" OR "emergency unit#" OR "emergency ward*" OR "accident and emergency")                                | 36 | ("emergency department*" OR "emergency room*" OR "emergency unit#" OR "emergency ward*" OR "accident and emergency") S31 OR S32 OR S33 OR S34 OR S35 OR S36 |                                                                                                                                                                                                                                                                                                                                                                                                                                          |
| 32 | or/28-31                                                                                                                                                           | 32 | #28 OR #29 OR #30 OR #31                                                                                                                                         | 32 | S28 OR S29 OR S30 OR S31                                                                                                                            | 37 | OR S36                                                                                                                                                      |                                                                                                                                                                                                                                                                                                                                                                                                                                          |
| 33 | Alcoholics/                                                                                                                                                        | 33 | 'drug dependence'/exp                                                                                                                                            | 33 | (MH "Substance Abusers+") (MH "Substance                                                                                                            | 38 | DE "Drug Abuse"                                                                                                                                             |                                                                                                                                                                                                                                                                                                                                                                                                                                          |
| 34 | Drug Users/                                                                                                                                                        | 34 | 'injection drug user'/exp                                                                                                                                        | 34 | Dependence")                                                                                                                                        | 39 | DE "Drug Dependency"                                                                                                                                        |                                                                                                                                                                                                                                                                                                                                                                                                                                          |
|    |                                                                                                                                                                    | 35 | 'recreational drug use'/exp                                                                                                                                      |    |                                                                                                                                                     | 40 | DE "Opioid Use Disorder"                                                                                                                                    |                                                                                                                                                                                                                                                                                                                                                                                                                                          |
|    |                                                                                                                                                                    |    |                                                                                                                                                                  |    |                                                                                                                                                     | 41 | DE "Alcohol Use Disorder"                                                                                                                                   |                                                                                                                                                                                                                                                                                                                                                                                                                                          |
|    |                                                                                                                                                                    |    |                                                                                                                                                                  |    |                                                                                                                                                     | 42 | DE "Substance Use Disorder"                                                                                                                                 |                                                                                                                                                                                                                                                                                                                                                                                                                                          |
| 35 | ("people who use drugs" or "persons who use drugs" or pwud).ti,ab,kw,kf.                                                                                           | 36 | ('people who use drugs' OR 'persons who use drugs' OR pwud):ti,ab,kw                                                                                             | 35 | ("people who use drugs" OR "persons who use drugs" OR pwud)                                                                                         | 43 | ("people who use drugs" OR "persons who use drugs" OR pwud)                                                                                                 | 3                                                                                                                                                                                                                                                                                                                                                                                                                                        |
| 36 | ("people who inject drugs" or "persons who inject drugs").ti,ab,kw,kf.                                                                                             | 37 | ('people who inject drugs' OR 'persons who inject drugs'):ti,ab,kw                                                                                               | 36 | ("people who inject drugs" OR "persons who inject drugs")                                                                                           | 44 | ("people who inject drugs" OR "persons who inject drugs")                                                                                                   | TITLE-ABS-KEY("people who use drugs" OR "persons who use drugs" OR pwud OR "people who inject drugs" OR "persons who inject drugs" OR "people who use alcohol" OR "persons who use alcohol" OR pwua OR ((drug OR drugs OR substance* OR opioid* OR opiate* OR alcohol) W/2 (abuse* OR "use" OR user OR users* OR addict* OR involve* OR depend* OR habit*)) OR alcoholic* OR alcoholism OR addict OR addicts OR addiction* OR overdose*) |
| 37 | ("people who use alcohol" or "persons who use alcohol" or pwua).ti,ab,kw,kf.                                                                                       | 38 | ('people who use alcohol' OR 'persons who use alcohol' OR pwua):ti,ab,kw                                                                                         | 37 | ("people who use alcohol" OR "persons who use alcohol" OR pwua)                                                                                     | 45 | ("people who use alcohol" OR "persons who use alcohol" OR pwua)                                                                                             |                                                                                                                                                                                                                                                                                                                                                                                                                                          |
| 38 | ((drug or drugs or substance* or opioid* or opiate* or alcohol) adj2 (abuse* or "use" or user or users* or addict* or involve* or depend* or habit*)).ti,ab,kw,kf. | 39 | ((drug OR drugs OR substance* OR opioid* OR opiate* OR alcohol) NEAR/2 (abuse* OR 'use' OR user OR users* OR addict* OR involve* OR depend* OR habit*)):ti,ab,kw | 38 | ((drug OR drugs OR substance* OR opioid* OR opiate* OR alcohol) N2 (abuse* OR "use" OR user OR users* OR addict* OR involve* OR depend* OR habit*)) | 46 | ((drug OR drugs OR substance* OR opioid* OR opiate* OR alcohol) N2 (abuse* OR "use" OR user OR users* OR addict* OR involve* OR depend* OR habit*))         |                                                                                                                                                                                                                                                                                                                                                                                                                                          |
| 39 | (alcoholic* or alcoholism).ti,ab,kw,kf.                                                                                                                            | 40 | (alcoholic* OR alcoholism):ti,ab,kw                                                                                                                              | 39 | (alcoholic* OR alcoholism)                                                                                                                          | 47 | (alcoholic* OR alcoholism)                                                                                                                                  |                                                                                                                                                                                                                                                                                                                                                                                                                                          |
| 40 | (addict or addicts or addiction*).ti,ab,kw,kf.                                                                                                                     | 41 | (addict OR addicts OR addiction*):ti,ab,kw                                                                                                                       | 40 | (addict OR addicts OR addiction*)                                                                                                                   | 48 | (addict OR addicts OR addiction*)                                                                                                                           | 4                                                                                                                                                                                                                                                                                                                                                                                                                                        |
|    |                                                                                                                                                                    |    |                                                                                                                                                                  |    |                                                                                                                                                     |    |                                                                                                                                                             | #1 AND #2 AND #3                                                                                                                                                                                                                                                                                                                                                                                                                         |

|    |                                                                                                         |    |                                                                                                      |    |                                                                                                      |    |                                                                                                      |   |                                                                                                                               |
|----|---------------------------------------------------------------------------------------------------------|----|------------------------------------------------------------------------------------------------------|----|------------------------------------------------------------------------------------------------------|----|------------------------------------------------------------------------------------------------------|---|-------------------------------------------------------------------------------------------------------------------------------|
| 41 | overdose*.ti,ab,kw,<br>kf.                                                                              | 42 | overdose*.ti,ab,kw<br>#33 OR #34 OR #35 OR #36 OR<br>#37 OR #38 OR #39 OR #40 OR<br>#41 OR #42       | 41 | overdose*<br>S33 OR S34 OR S35 OR S36 OR<br>S37 OR S38 OR S39 OR S40 OR<br>S41                       | 49 | overdose*<br>S38 OR S39 OR S40 OR S41 OR S42<br>OR S43 OR S44 OR S45 OR S46 OR<br>S47 OR S48 OR S49  | 5 | #4 AND NOT (INDEX(medline) OR<br>INDEX(embase))                                                                               |
| 42 | or/33-41                                                                                                | 43 | #27 AND #32 AND #43                                                                                  | 42 | S27 OR S32 OR S42                                                                                    | 50 | S30 OR S37 OR S50                                                                                    |   |                                                                                                                               |
| 43 | 27 and 32 and 42                                                                                        | 44 |                                                                                                      | 43 |                                                                                                      | 51 |                                                                                                      |   |                                                                                                                               |
|    | <b>6519 results 2021-07-07</b><br><i>Amended search</i><br>2021-09-15<br><b>6698 results 2021-09-15</b> |    | <b>8795 results 2021-07-07</b><br><i>Amended search 2021-09-15</i><br><b>9379 results 2021-09-15</b> |    | <b>2358 results 2021-07-07</b><br><i>Amended search 2021-09-15</i><br><b>2581 results 2021-09-15</b> |    | <b>3568 results 2021-07-07</b><br><i>Amended search 2021-09-15</i><br><b>3801 results 2021-09-15</b> |   | <b>479 results 2021-07-07</b><br><i>Amended search 2021-09-15</i><br><b>506 results 2021-09-15</b><br><br><i>Full string:</i> |

((TITLE-ABS-KEY((harm\* W/2 (reduc\* OR minimiz\* OR minimis\*)) OR stigma\* OR destigma\* OR "de-stigma" OR (addiction\* W/2 (consultation\* OR counsel\* OR therap\* OR treatment\* OR service\*)) OR "medication assisted therap\*" OR "medication assisted treatment\*" OR "opiate substitution\*" OR "opiate replacement\*" OR "opioid\* substitution\*" OR "opioid\* replacement\*" OR "opioid agonist\*" OR "substitution therap\*" OR methadone OR buprenorphine OR naloxone OR "non-abstinence" OR ((needle\* OR syringe\*) W/2 (exchange\* OR clean\* OR steril\*)) OR ((supervized OR supervised) W/2 (inject\* OR consum\*)) OR (consumption W/3 site) OR "overdose prevention site\*" OR "safe supply" OR ((care OR healthcare) W/2 (retention OR retain\* OR continuity OR continuum)) OR aftercare OR handoff OR "hand-off" OR "patient transition\*" OR "patient transfer\*" OR "leav\* against medical advice" OR "left against medical advice" OR (leav\* W/2 early) OR (left W/2 early) OR abscond\* OR (early W/1 discharge\*) OR ((staff OR worker\* OR employee\* OR system) W/3 (cultur\* OR attitude\* OR belief\* OR misconception\* OR perception\* OR perceiv\* OR resist\* OR educat\* OR train\* OR language)))) AND (TITLE-ABS-KEY(admitted OR admission\* OR hospitalis\* OR hospitaliz\* OR inpatient\* OR overnight\* OR "emergency department\*" OR "emergency room\*" OR "emergency unit\*" OR "emergency ward\*" OR "accident and emergency")) AND (TITLE-ABS-KEY("people who use drugs" OR "persons who use drugs" OR pwud OR "people who inject drugs" OR "persons who inject drugs" OR "people who use alcohol" OR "persons who use alcohol" OR pwua OR ((drug OR drugs OR substance\* OR opioid\* OR opiate\* OR alcohol) W/2 (abuse\* OR "use" OR user OR users\* OR addict\* OR involve\* OR depend\* OR habit\*)) OR alcoholic\* OR alcoholism OR addict OR addicts OR

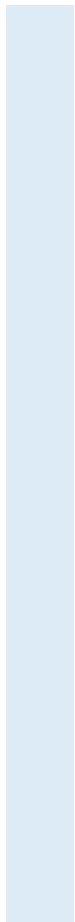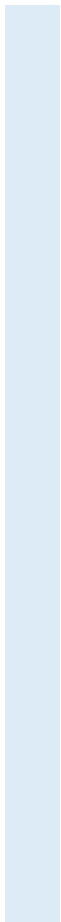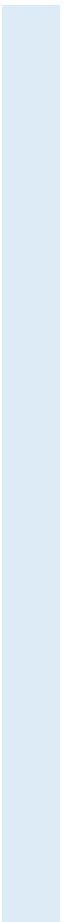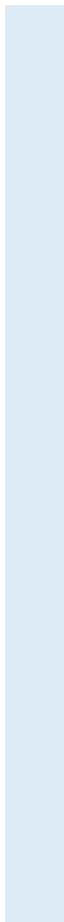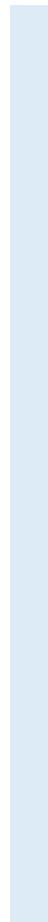

addiction\* OR overdose\*)) AND NOT  
(INDEX(medline) OR INDEX(embase))

Supplementary Table 2: Harm Reduction Scoping Review Extraction Form (Draft)

| Author, Year | Country | Study Design | Objective | Setting | Participant Characteristics (sample size, age, gender) | Description of Harm Reduction Strategy | Barriers or Enablers to Implementation |                   | Patient-related Outcomes Measured |                    | Health-related outcomes measured |                |                   | Description of Main Results |
|--------------|---------|--------------|-----------|---------|--------------------------------------------------------|----------------------------------------|----------------------------------------|-------------------|-----------------------------------|--------------------|----------------------------------|----------------|-------------------|-----------------------------|
|              |         |              |           |         |                                                        |                                        | Reported Barriers                      | Reported Enablers | Satisfaction level                | Experience of care | LOS                              | Mortality Rate | Re-admission rate |                             |
|              |         |              |           |         |                                                        |                                        |                                        |                   |                                   |                    |                                  |                |                   |                             |
|              |         |              |           |         |                                                        |                                        |                                        |                   |                                   |                    |                                  |                |                   |                             |

LOS: length of stay
